# Supplementary material for: Effects of low molecular weight heparin on the polarization and cytokine profile of macrophages and T helper cells in vitro
Source: PubMed Central journal article supplement (PMC5843640; doi:10.1038/s41598-018-22418-2), 2018-03-08
Supplement: 41598_2018_22418_MOESM1_ESM.pdf [file 41598_2018_22418_MOESM1_ESM.pdf]

**Effects of low molecular weight heparin on the polarization and cytokine profile of  
macrophages and T helper cells *in vitro***

**\*Bruno Valentina <sup>a,b</sup>, \*Svensson-Arvelund Judit <sup>b</sup>, Rubér Marie <sup>c</sup>, Berg Göran <sup>c</sup>, Piccione Emilio <sup>a</sup>,  
Jenmalm Maria C. <sup>b</sup>, Ernerudh Jan <sup>d</sup>**

\* These authors contributed equally to the paper

<sup>a</sup> Academic Department of Biomedicine and Prevention, Section of Gynecology and Obstetrics, University of Rome Tor Vergata and Department of Surgery, Section of Gynecology and Obstetrics, Tor Vergata University Hospital, Viale Oxford, 81, Rome, Italy

<sup>b</sup> Department of Clinical and Experimental Medicine, Linköping University, SE-581 83 Linköping, Sweden

<sup>c</sup> Department of Obstetrics and Gynecology, and Department of Clinical and Experimental Medicine, Linköping University, SE-581 83 Linköping, Sweden

<sup>d</sup> Department of Clinical Immunology and Transfusion Medicine, and Department of Clinical and Experimental Medicine, Linköping University, SE-581 83 Linköping, Sweden

**Correspondence to:** Dr. Valentina Bruno, M.D., Department of Biomedicine and Prevention, Section of Gynecology and Obstetrics, University of Rome Tor Vergata and Department of Surgery, Section of Gynecology and Obstetrics, Tor Vergata University Hospital, Viale Oxford, 81, 00133, Rome, Italy,

tel. +39 0620902924, e-mail: valentinabruno\_86@hotmail.it

## Supplemental data.

Supplemental table I. Antibodies used for flow cytometry.

| Cell type             | Antigen | Isotype     | Fluorochrome | Manufacturer   |
|-----------------------|---------|-------------|--------------|----------------|
| <b>Macrophages</b>    | HLA-DR  | Mouse IgG2b | FITC         | BD Biosciences |
|                       | CD 163  | Mouse IgG1  | PE           | BD Biosciences |
|                       | CD 206  | Mouse IgG1  | APC          | BD Biosciences |
|                       | CD 209  | Mouse IgG2b | PerCP-Cy5.5  | BD Biosciences |
|                       | CD86    | Mouse IgG1  | V450         | BD Biosciences |
| <b>T helper cells</b> | CD4     | /           | FITC         | BD Biosciences |
|                       | CD25    | Rat IgG2a   | PC-7         | BioLegend      |
|                       | GATA-3  | Mouse IgG2b | PerCP-Cy5.5  | BioLegend      |
|                       | Foxp3   | Rat IgG2a   | PE           | eBioscience    |
|                       | Roryt   | Rat IgG2a   | APC          | eBioscience    |
|                       | T-bet   | Mouse IgG1  | Pacific Blue | BioLegend      |

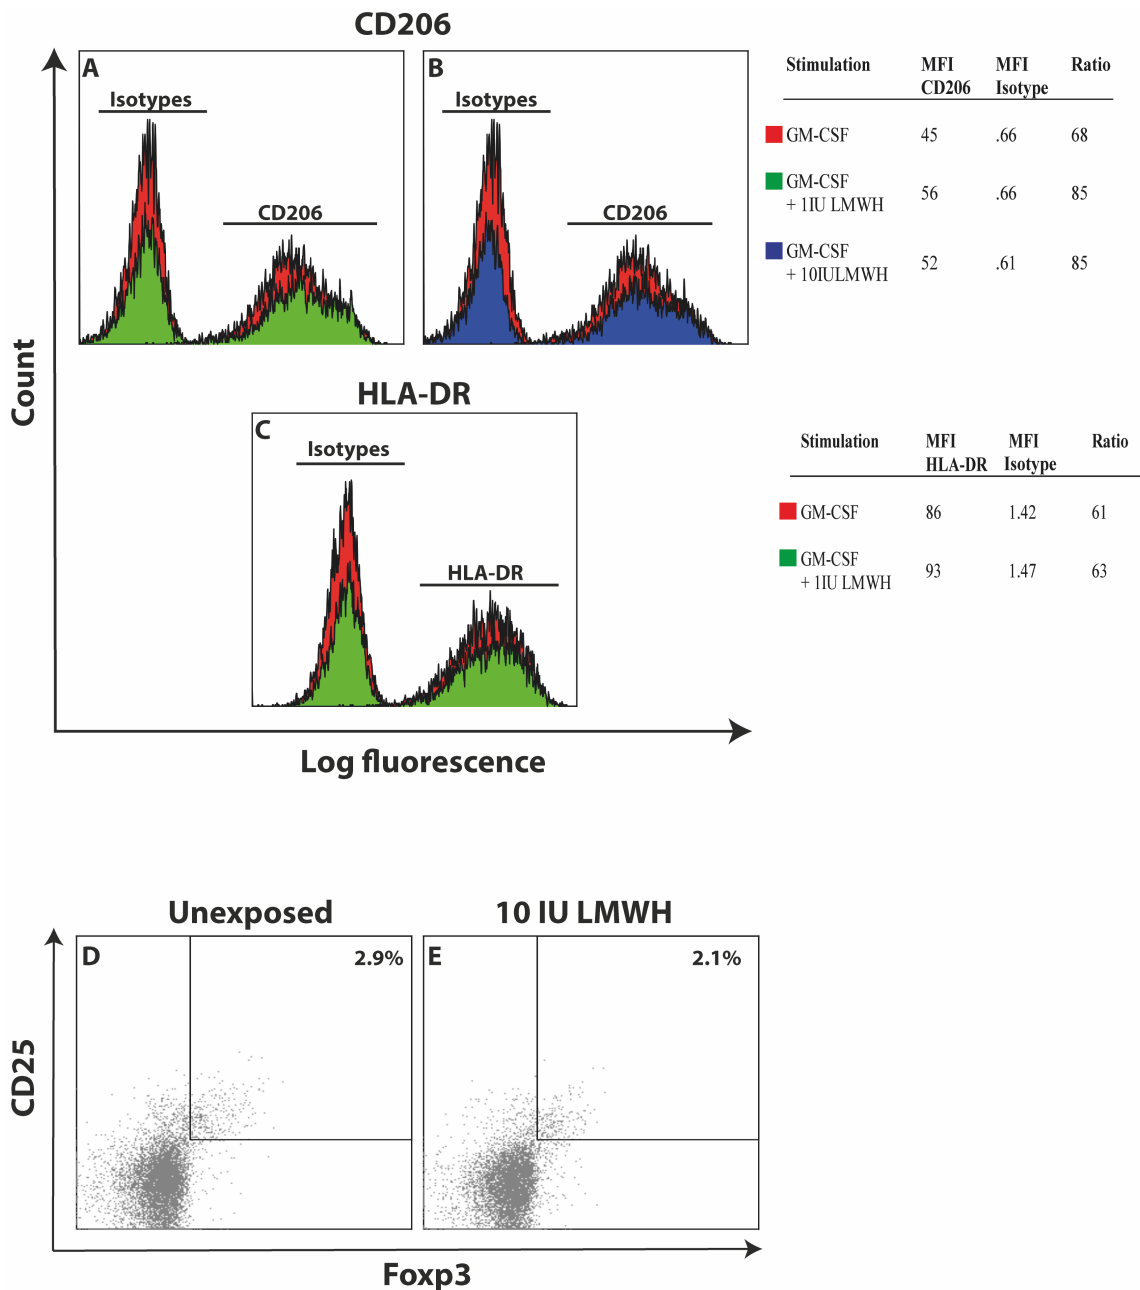

**Supplemental Figure 1. Representative examples of macrophage (1A-C) and T cell (1D-E) markers, measured as fluorescence intensity (1A-C) or proportion of cells (%), (1D-E).**

Blood monocytes were cultured for 6 days with GM-CSF (red colour in histograms) in the absence or presence of 1 IU (green colour in histograms) or 10 IU (blue colour in histograms) LMWH. Isolated blood CD4 T cells were cultured for 3 days in the absence or presence of 10 IU LMWH. A and B show an increase in median fluorescence intensity (MFI) of CD206 when exposed to 1 IU (MFI, 56) or 10 IU (MFI, 52) LMWH as compared with LMWH unexposed cells (MFI, 45). C shows an increase in median fluorescence intensity (MFI) of HLA-DR when exposed to 1 IU (MFI, 93) LMWH as compared with the LMWH unexposed cells (MFI, 86). The MFIs of CD206, HLA-DR and their corresponding isotype controls, as well as ratios (CD206 or HLA-DR MFI/corresponding isotype controls MFIs) are shown in the right panels. D and E are representative examples showing increased proportions of CD25<sup>high</sup>Foxp3<sup>+</sup> Treg cells in the presence of 10 IU LMWH compared with unexposed cells.

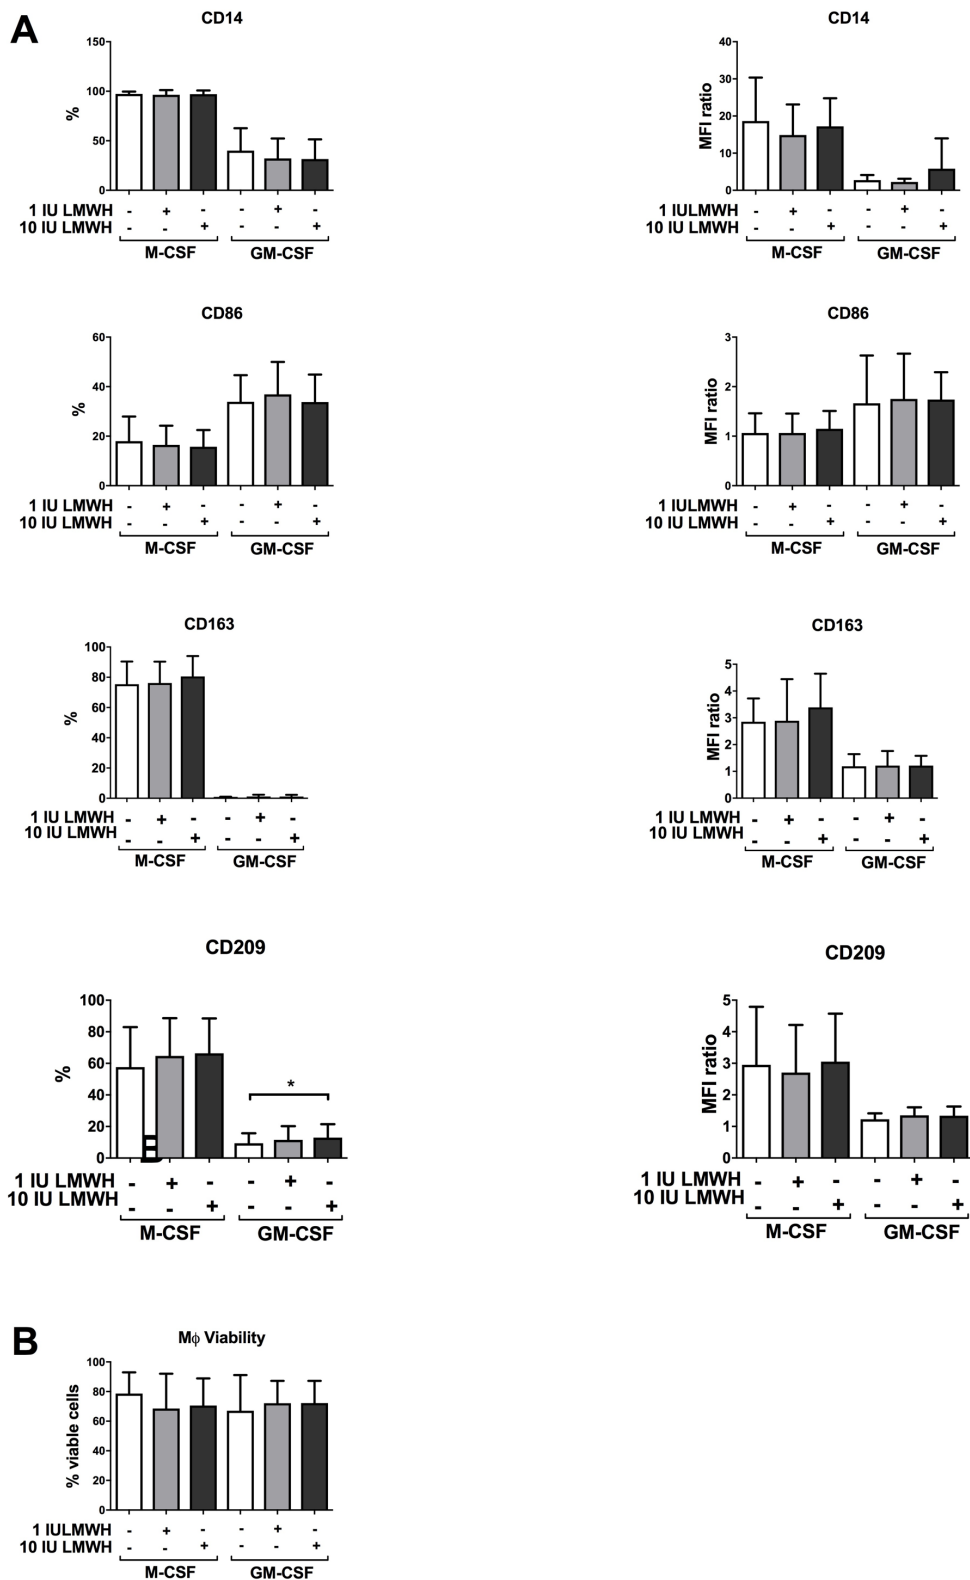

**Supplemental Figure 2. Effects of LMWH on macrophage polarization and viability.**

Effect of LMWH on macrophage phenotype markers, measured as proportion of cells (%) and relative expression of the entire population (median fluorescence intensity, MFI) (A) and on viability (B). Macrophages were cultured with GM-CSF and M-CSF in the absence or presence of 1 or 10 IU LMWH. One Way ANOVA (A) and Student's t- test (B) were performed: no statistical significant differences were found; (A) n = 8, (B) n = 7.

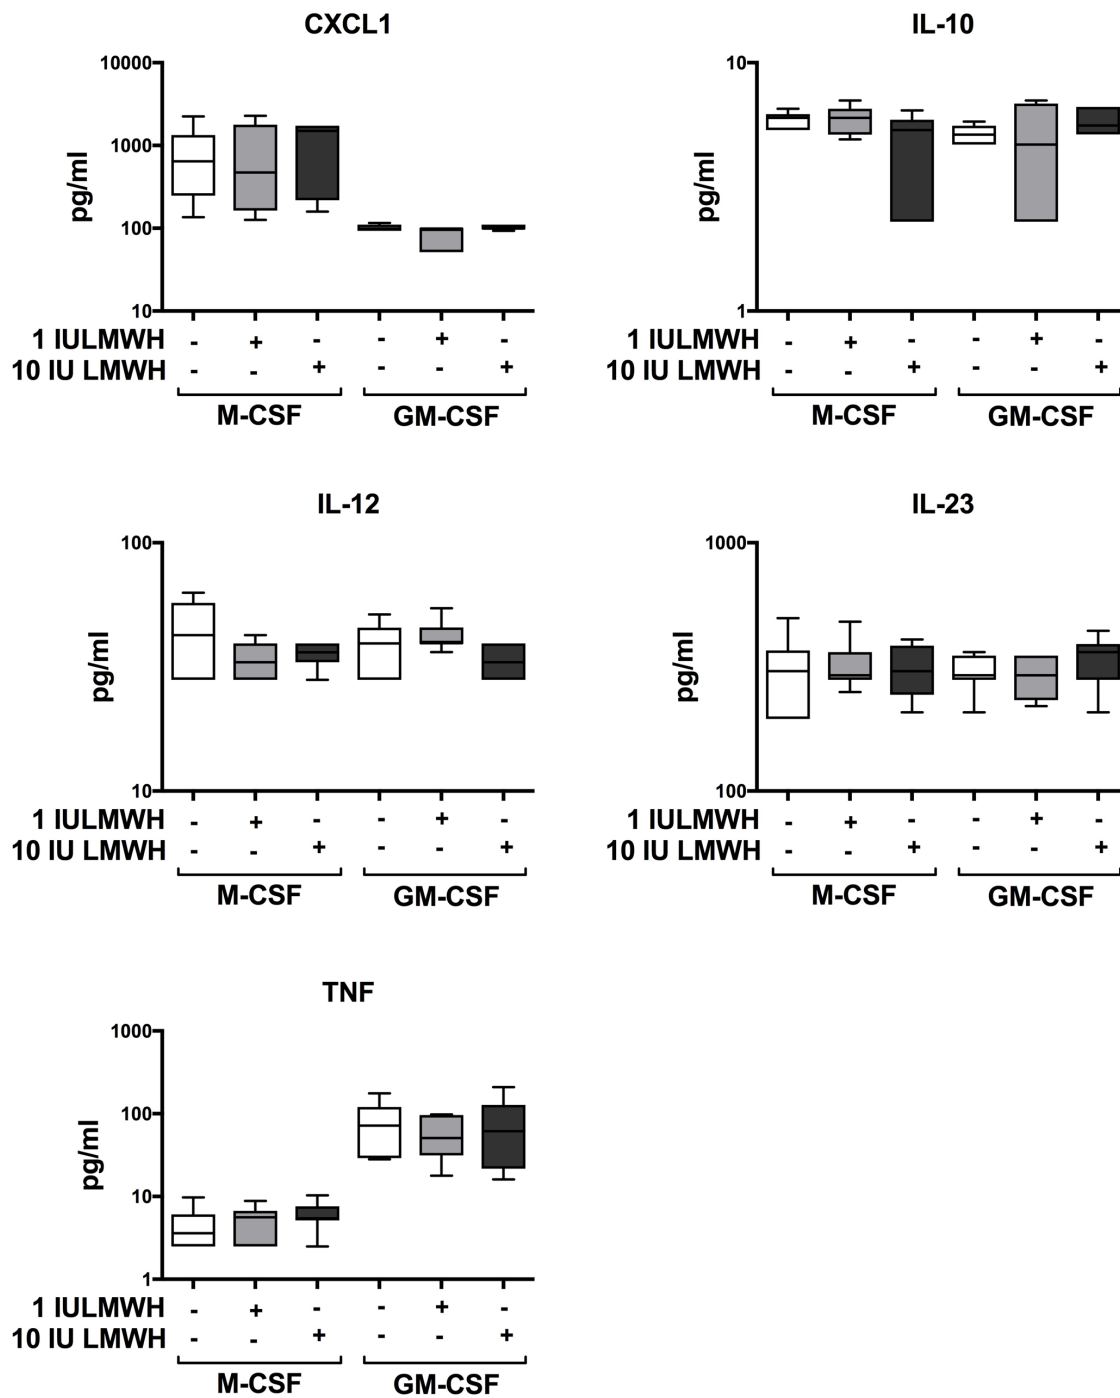

**Supplemental Figure 3. Effects of LMWH on the production of chemokines and cytokines by macrophages.**

Macrophages were cultured with GM-CSF and M-CSF in the absence or presence of 1 or 10 IU LMWH. Friedman test was performed: no statistical significant differences were found; n = 7.

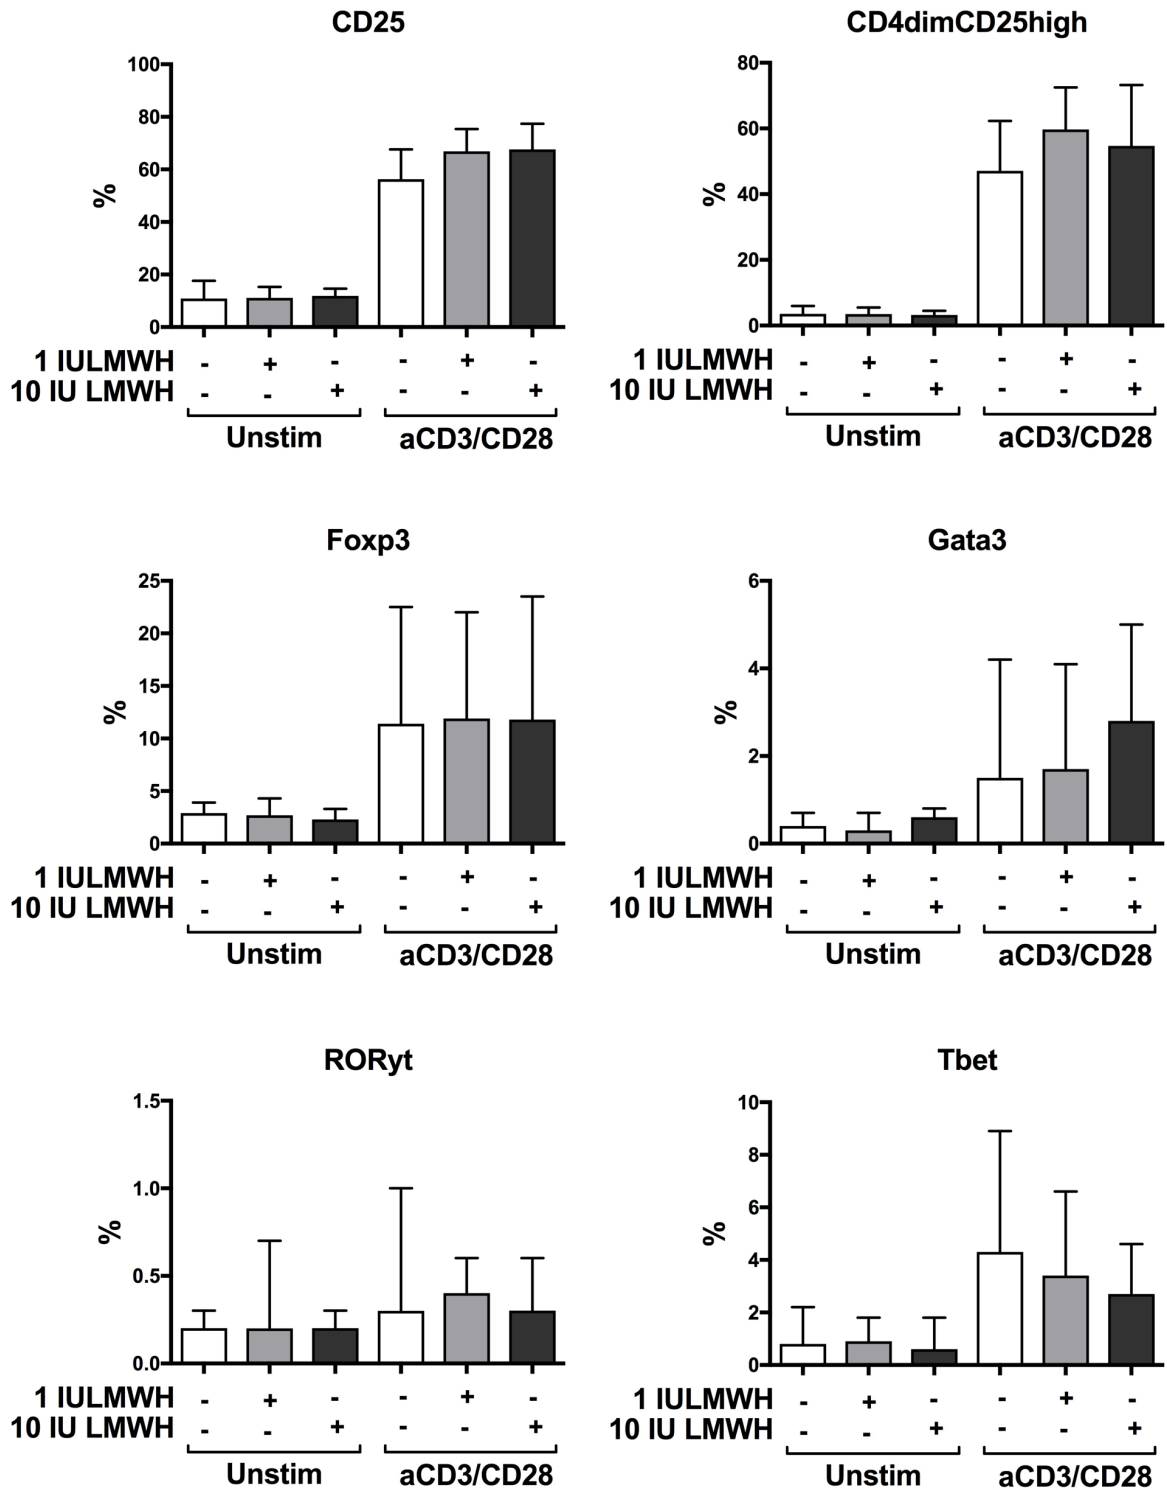

**Supplemental Figure 4. Effects of LMWH on Th cells polarization.**

Effects of LMWH on Th cell phenotype. CD4<sup>+</sup> T cells, both unstimulated and stimulated with anti-CD3 and anti-CD28 Abs, were cultured in the absence or presence of 1 or 10 IU LMWH. One Way ANOVA was performed: no statistical significant differences were found; n = 7.

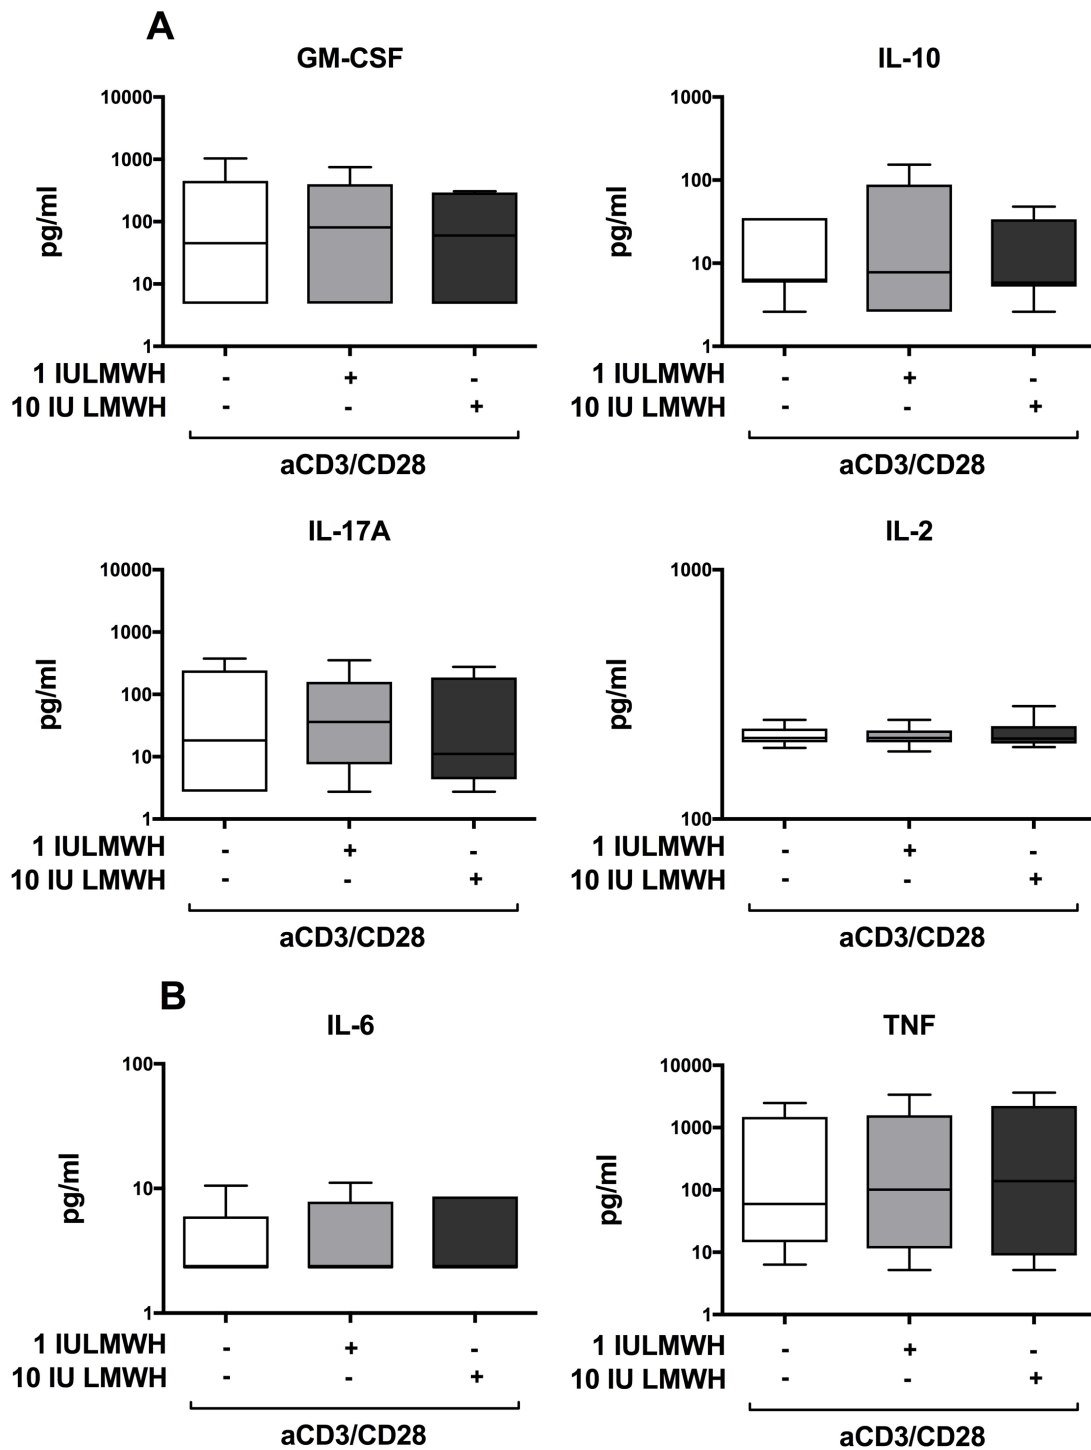

**Supplemental Figure 5. Effects of LMWH on the production of cytokines and chemokines by Th cells.**

CD4<sup>+</sup> T cells, both unstimulated and stimulated with anti-CD3 and anti-CD28 Abs, were cultured in the absence or presence of 1 or 10 IU LMWH. Friedman test was performed: no statistical significant differences were found. IL-1 $\beta$  was undetectable (data not shown). (A) n = 19 (unexposed and exposed to 1 IU LMWH) and n = 17 (exposed to 10 IU LMWH), (B) n = 11.

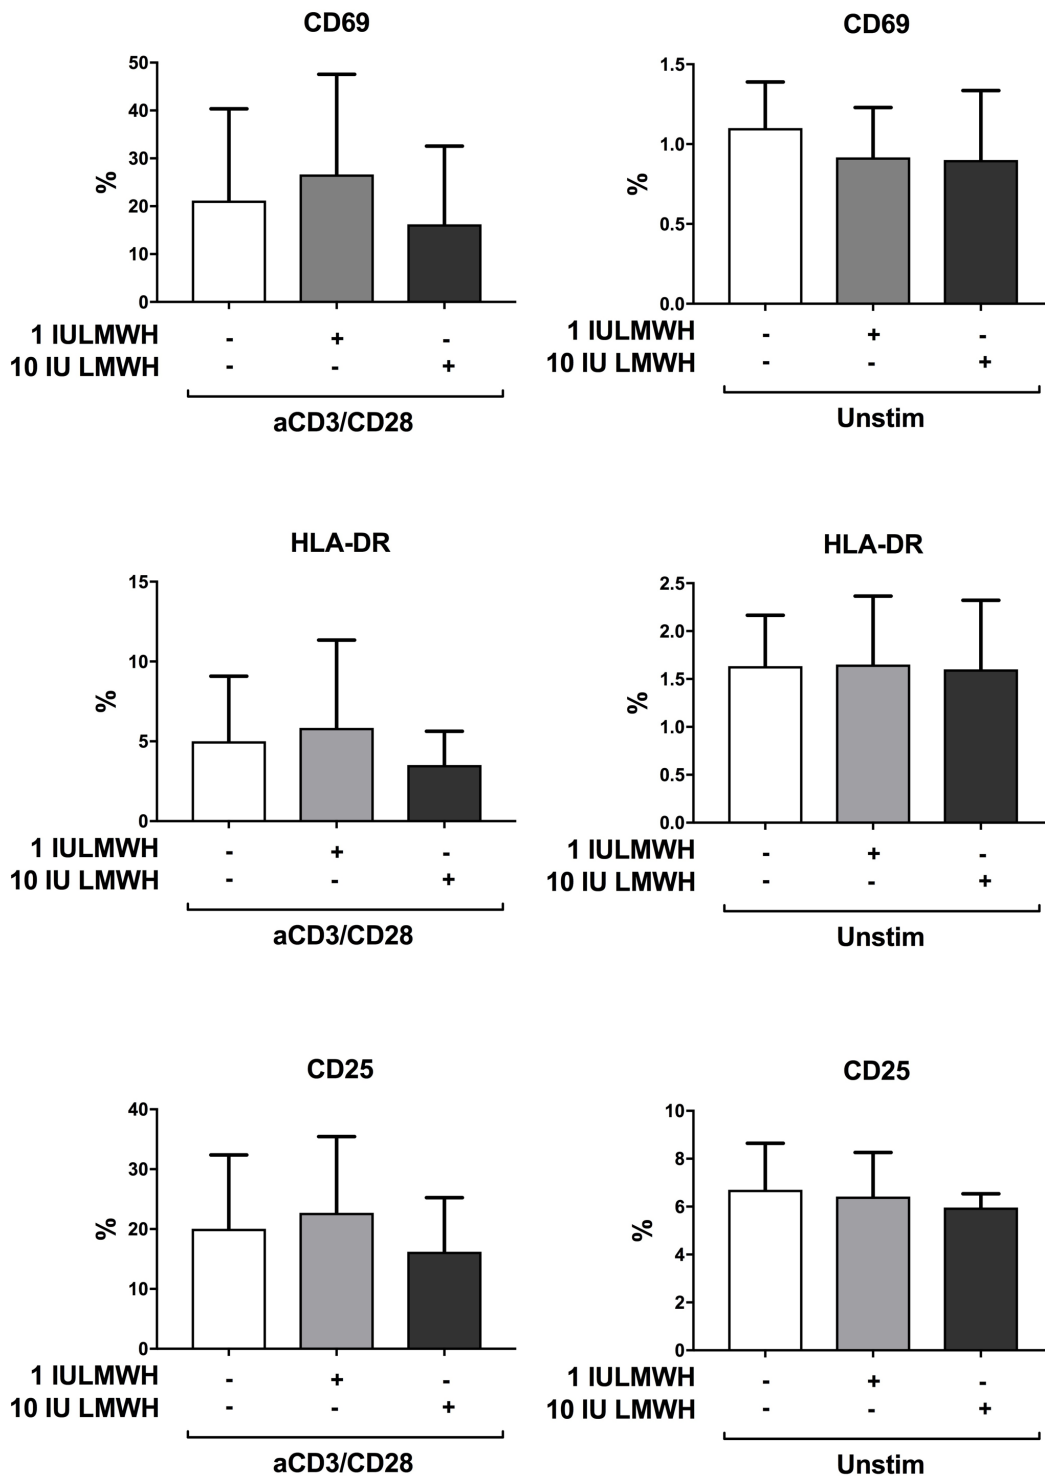

**Supplemental Figure 6. Effects of LMWH on Th cells activation markers.**

Effects of LMWH on Th cell activation markers. CD4<sup>+</sup> T cells, both unstimulated and stimulated with anti-CD3 and anti-CD28 Abs, were cultured in the absence or presence of 1 or 10 IU LMWH. One Way ANOVA was performed: no statistical significant differences were found; n = 11 (unexposed and exposed to 1 IU LMWH in T cell stimulated samples), n = 8 (exposed to 10 IU LMWH in T cell stimulated samples), n = 6 (unexposed and exposed to 1 IU LMWH in T cell unstimulated samples), and n = 3 (exposed to 10 IU LMWH in T cell unstimulated samples).



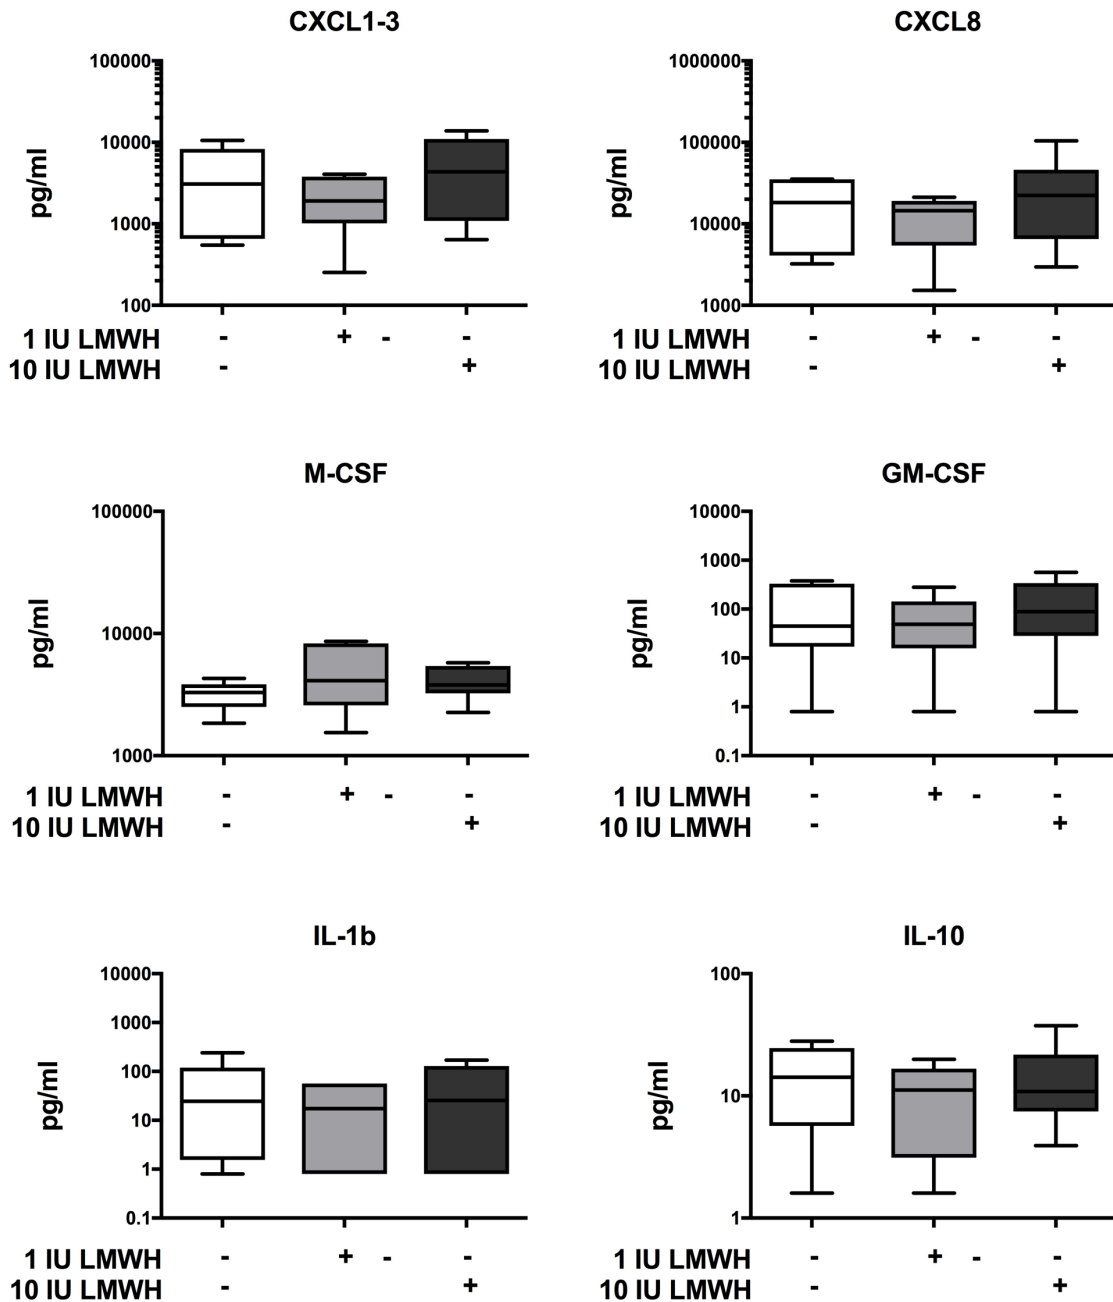

**Supplemental Figure 7. Effects of LMWH on 1<sup>st</sup> trimester placental explants.**

Effects of LMWH on the production of soluble factors by placental explants. Placenta explants were exposed or not to 1 or 10 IU of LMWH. Friedman test was performed: no statistical significant differences were found. VEGF and sFasL were undetectable (data not shown). n = 10.
